# Supplementary material
Source: PubMed Central journal article supplement (PMC3425188)
Supplement: supp_pp.112.199042_199042Supplemental_data.pdf [file supp_pp.112.199042_199042Supplemental_data.pdf]

**Supplemental Table S1** The ratio of variable to maximum quantum yield of PSII (Fv/Fm) measured from mature leaves using the FluorCam 700MF.

| Plant       | Maximum quantum yield of PSII (Fv/Fm) *                          |                   |
|-------------|------------------------------------------------------------------|-------------------|
|             | High-light (2,500 $\mu\text{mol photons m}^{-2} \text{s}^{-1}$ ) |                   |
|             | 0 min                                                            | 60 min            |
| Col         | 0.812 $\pm$ 0.008                                                | 0.414 $\pm$ 0.043 |
| <i>var2</i> | 0.818 $\pm$ 0.011                                                | 0.266 $\pm$ 0.071 |

\* At each time point, leaves were dark adapted for 10 min prior to measurement. Values are means  $\pm$  sd (n = 5).

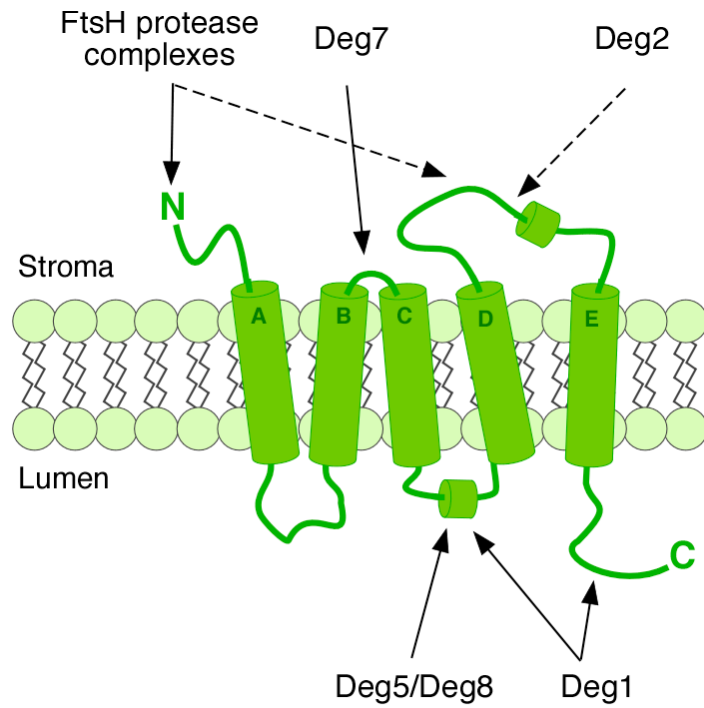

**Supplemental Figure S1** Schematic summary of the degradation of D1 protein till this study. FtsH and Deg proteases that have been reported in Arabidopsis are shown and the arrows indicate degradation/cleavage points. The solid and dashed line mean the in vivo evidence and the in vitro experiments, respectively.

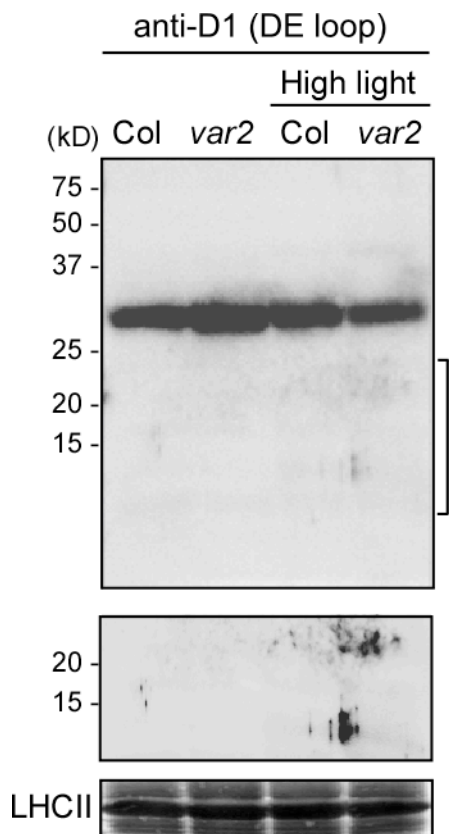

**Supplemental Figure S2** Immunoblot analysis of the cleavage product of the D1 protein by anti-D1 (DE loop) antibodies under normal- and high-light conditions. Mature leaves of Col and *var2* (approximately 6-weeks-old plants grown under normal conditions) were illuminated at normal-light ( $180 \mu\text{mol photons m}^{-2} \text{s}^{-1}$ ) and high-light ( $2,500 \mu\text{mol photons m}^{-2} \text{s}^{-1}$ ) for 1 h. A representative immunoblot using anti-D1 (DE loop) antibodies and the band corresponding to CBB-stained LHCII are depicted. A selective detection of the area indicated by a side bar is shown at the middle panels.

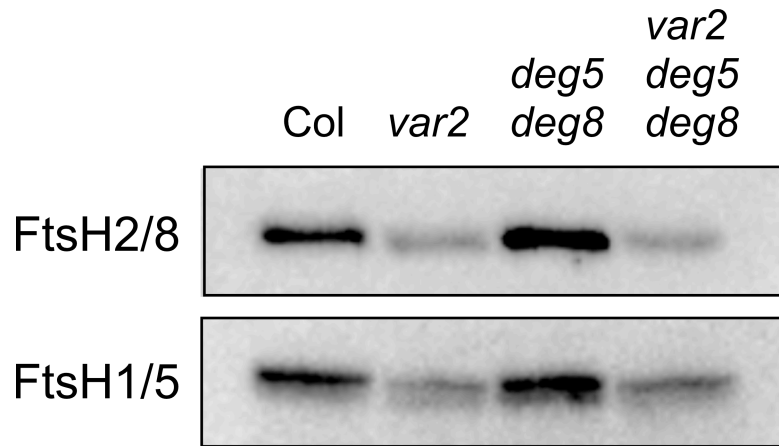

**Supplemental Figure S3** Level of FtsH isomers in the mutants. Membrane proteins were separated using SDS-PAGE and probed against typeA (FtsH1/5) and typeB (FtsH2/8) FtsH isomers. Samples were equally loaded based on chlorophyll contents.

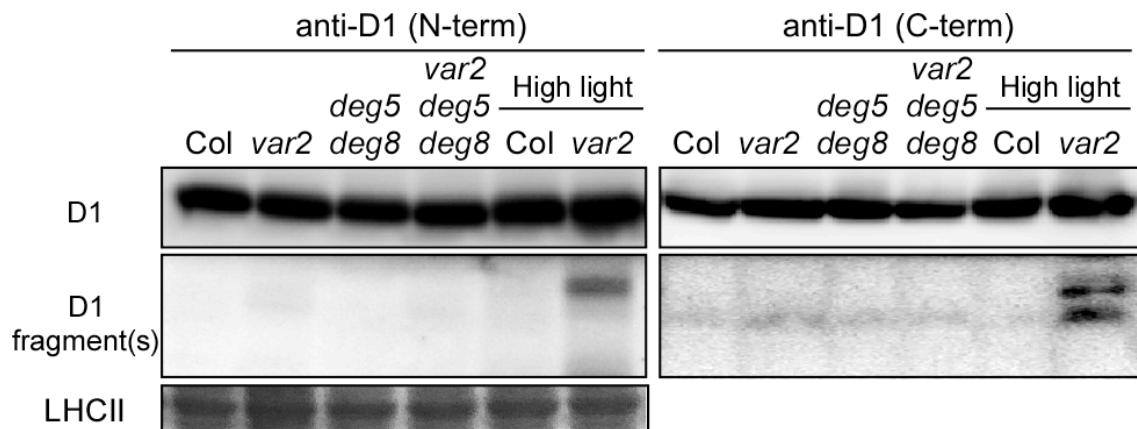

**Supplemental Figure S4.** Immunoblot analysis of the cleavage products of the D1 protein in *var2 deg5 deg8* mutant under normal light condition. Detached leaves of Col, *var2*, *deg5 deg8*, and *var2 deg5 deg8* (approximately 6-weeks-old plants grown under normal conditions) were incubated under nonphotoinhibitory light condition ( $180 \mu\text{mol photons m}^{-2} \text{s}^{-1}$ ) for 1 h. The samples of Col and *var2* leaves that were incubated at high-light ( $2,500 \mu\text{mol photons m}^{-2} \text{s}^{-1}$ , for 1 h) were loaded as controls. A representative immunoblot using anti-D1 (N-term) and anti-D1 (C-term) antibodies and the band corresponding to CBB-stained LHCII are depicted. A selective detection of the cleavage products of the D1 protein is shown at the lower panels.

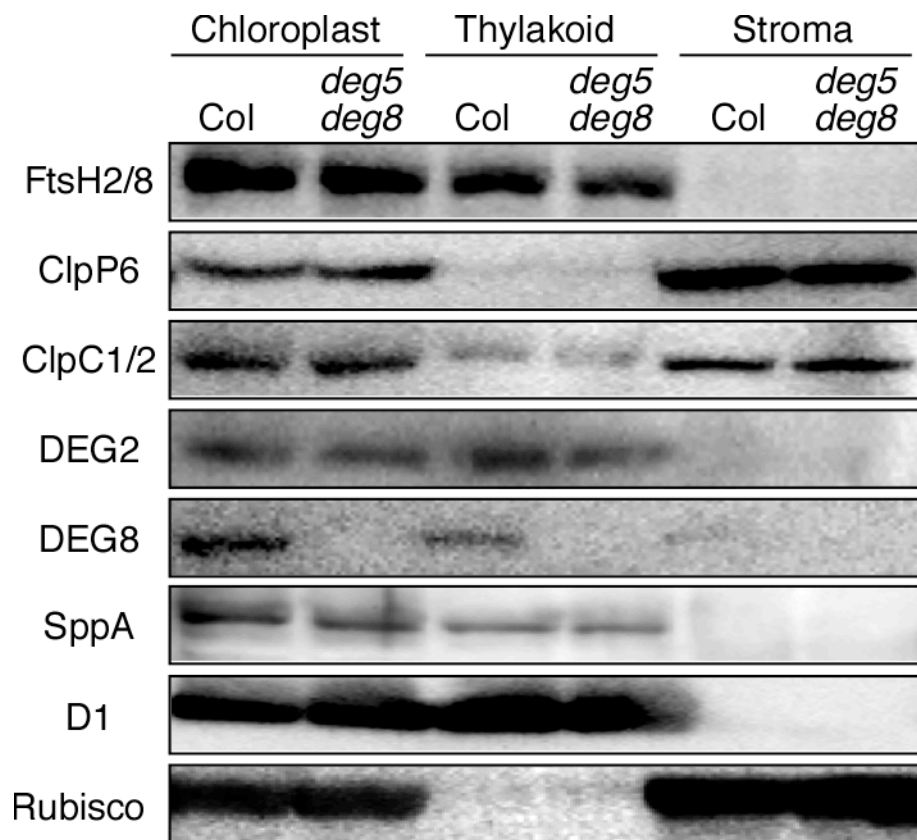

**Supplemental Figure S5.** Steady state accumulation and localization of chloroplast proteases. Chloroplasts were purified by a Percoll step gradient from mature leaves of Col and *deg5 deg8*. Intact chloroplasts were fractionated into stroma and membrane fractions. Proteins were separated by SDS-PAGE and blotted against specific antibodies. D1 and Rubisco large subunit were used as markers of membranes and stroma, respectively.

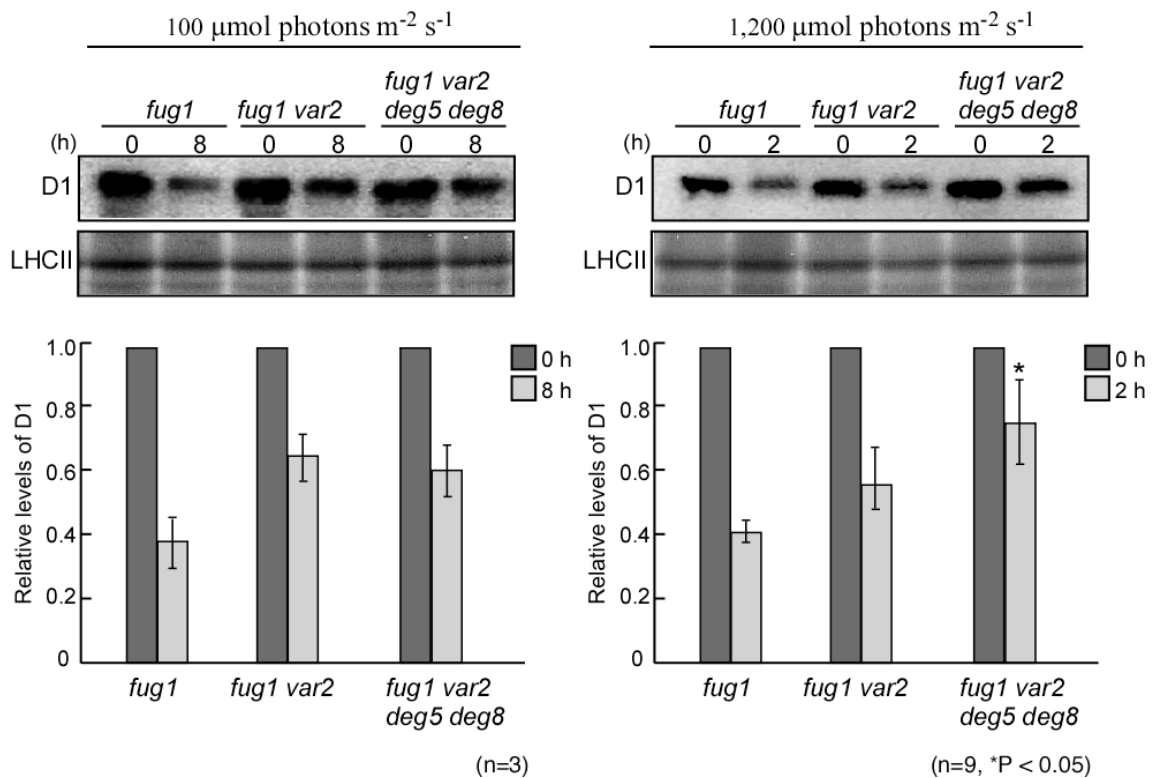

**Supplemental Figure S6.** Immunoblot analysis of D1 protein in *fug1*, *fug1 var2* and *fug1 var2 deg5 deg8* mutants. In vivo measurement of D1 turnover in variegated leaves gives limited results. To minimize such an experimental problem, a suppressor mutant of leaf variegation is used. The FU-GAERI1 (FUG1) locus encodes a chloroplastic translation initiation factor 2 (cpIF2). A leaky mutation in *fug1* recovers leaf variegation when combined with *var2* and *var2 deg5 deg8*. To isolate the quadruple mutant *fug1 var2 deg5 deg8*, *var2* was crossed with *fug1 var2* and *var2 deg5 deg8*. D1 turnover in the absence of FtsHs was assessed in *var2 fug1* and in the absence of FtsHs and Deg proteases was assessed in *var2 fug1 deg5 deg8*, and we used *fug1* as a control. Mature leaves of *fug1*, *fug1 var2* and *fug1 var2 deg5 deg8* (approximately 6-weeks-old plants grown under normal conditions) were preincubated with 5 mM lincomycin. The leaves were incubated for 2 h under high light condition (1,200  $\mu\text{mol photons m}^{-2} \text{s}^{-1}$ ) or for 8 h under growth light condition (100  $\mu\text{mol photons m}^{-2} \text{s}^{-1}$ ). A representative immunoblot using anti-D1 (C-term) antibodies and the band corresponding to CBB-stained LHCII are depicted. Signals of immunoblots from nine biological repeats were quantified using the ImageJ program and normalized to the amount of CBB-stained LHCII (SD with bars). Asterisk indicates statistically significant difference with the D1 degradation ratio in *fug1 var2* (P < 0.05). To compare D1 levels, ratios at 0 h were adjusted to 1.
